# Supplementary material for: Tonic excitation or inhibition is set by GABAA conductance in hippocampal interneurons
Source: PubMed Central journal article supplement — Nat Commun. 2011 Jul 5;2:376–. doi: 10.1038/ncomms1377 (PMC3144593; doi:10.1038/ncomms1377), 2011-07-05
Supplement: ncomms1377-s1.pdf [file ncomms1377-s1.pdf]

**Supplementary information “Tonic excitation or inhibition is set by GABA<sub>A</sub> conductance”**

*Inseon Song, Leonid Savtchenko, and Alexey Semyanov*

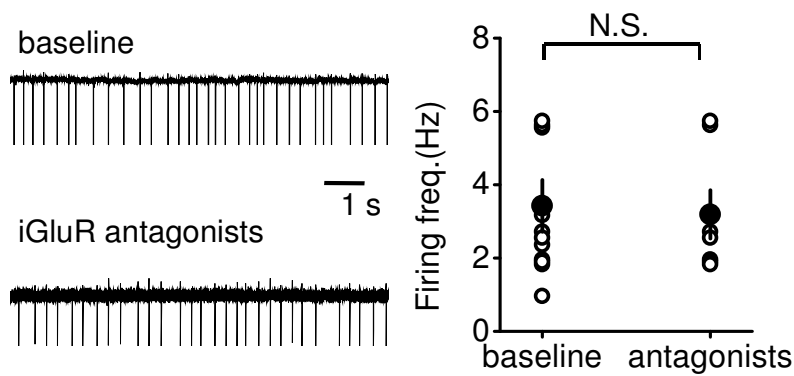

**Supplementary Figure S1. Hippocampal CA1 *str. radiatum* interneurons fire action potentials in the absence of synaptic excitation.**

*Left panel:* Interneuron firing rate at baseline conditions (without antagonists added) and in the presence of ionotropic glutamate receptor (iGluR) antagonists: 25  $\mu$ M APV and 25  $\mu$ M NBQX. *Right panel:* Summary data showing individual frequencies ( $n=11$  for baseline, filled circles;  $n=7$  for antagonists, empty circles) and mean frequencies (black circles). Error bars – SEM, N.S.  $P>0.05$ , unpaired  $t$ -test

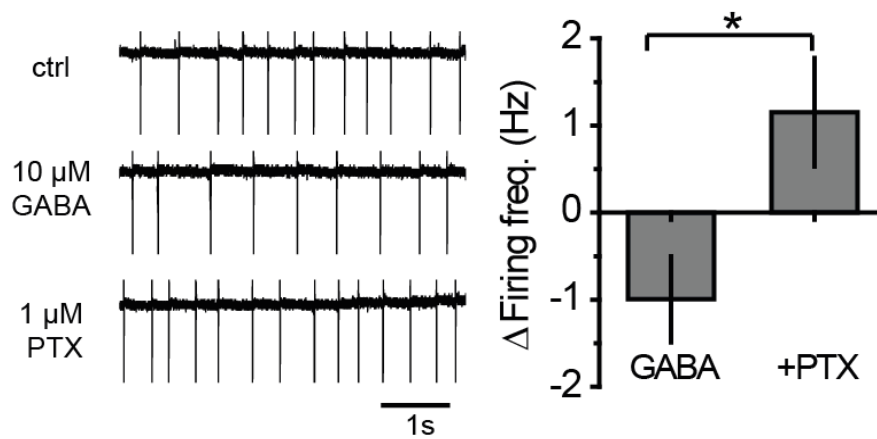

**Supplementary Figure S2. Low dose picrotoxin (1 μM) increases firing rate of interneurons in the presence of 10 μM GABA.**

*Left panel:* Representative interneuron firing recorded in cell-attached mode in control (ctrl) and in the presence of 10 μM GABA and then after sequential application of 1 μM picrotoxin. *Right panel:* Summary data of the change in the interneuron firing rate induced by GABA and picrotoxin relative to the control (n=6). Error bars – SEM, \* $P=0.018$  paired  $t$ -test.

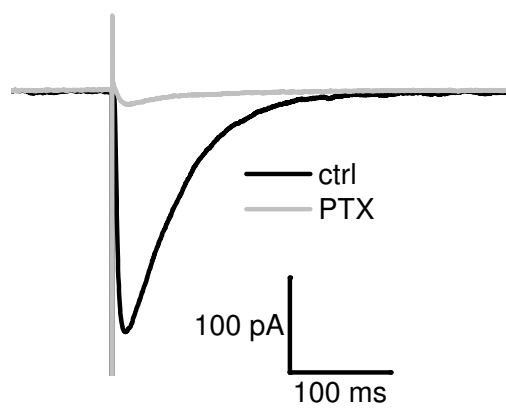

**Supplementary Figure S3. Sample of GABA<sub>A</sub> mediated synaptic current recorded in CA1 *str.radiatum* interneuron.**

Representative sample of PSC recorded in the presence of glutamate ionotropic and GABA<sub>B</sub> receptor antagonists (ctrl, black trace). The PSC was almost completely blocked by 100  $\mu$ M picrotoxin (PTX, grey trace).

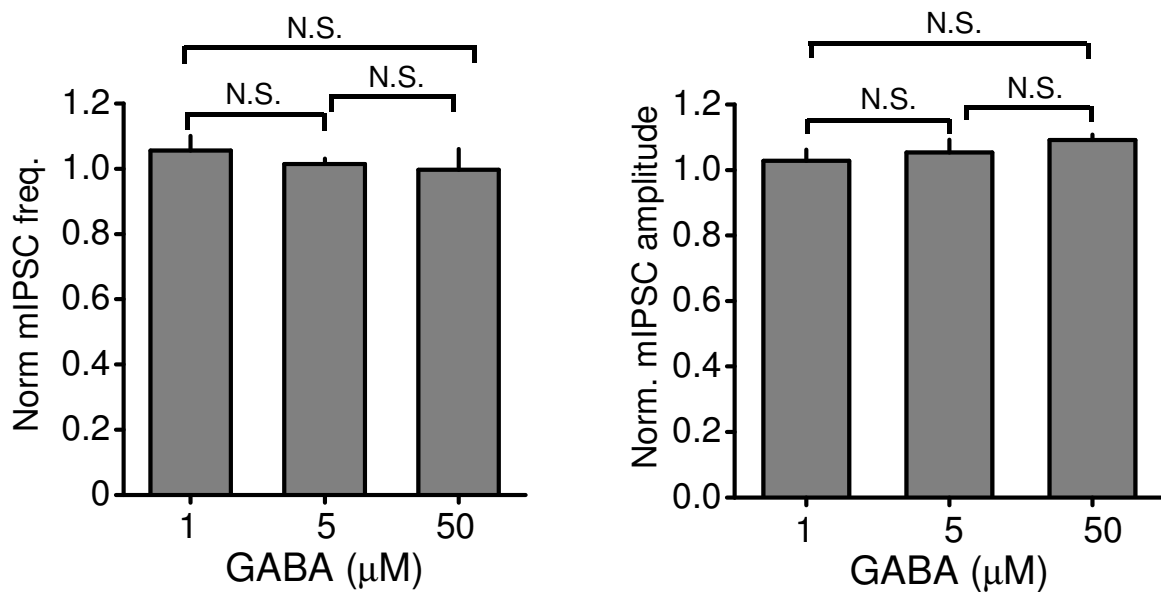

**Supplementary Figure S4. Exogenous GABA did not change the frequency and the amplitude of mIPSCs in pyramidal neurons.**

(a) Summary of mIPSC frequency recorded in 1, 5, and 50 μM GABA and normalised to the mIPSC frequency before drug application (n=4). (b) Summary of mean mIPSC amplitudes recorded in 1, 5, and 50 μM GABA and normalised to the mIPSC amplitude before drug application (n=4). Error bars – SEM, N.S.  $P > 0.05$  paired  $t$ -test.

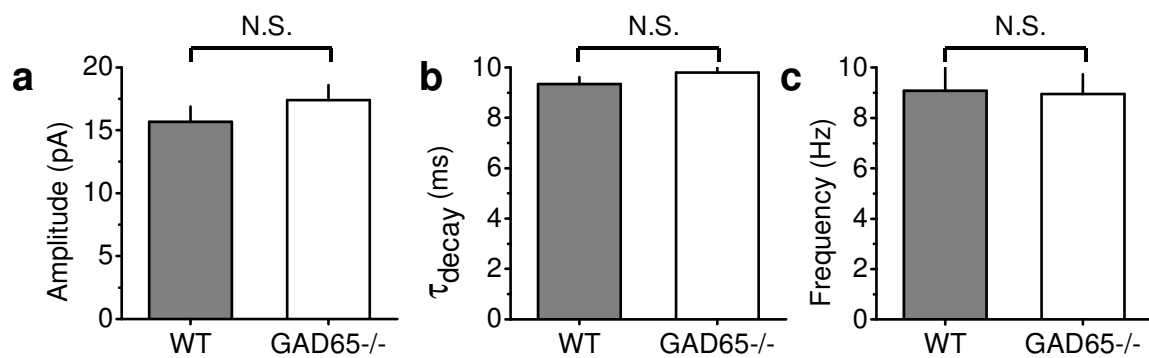

**Supplementary Figure S5. mIPSCs are not different in WT and GAD65<sup>-/-</sup> interneurons.**

Summary histograms of the amplitude (**a**), decay time constant ( $\tau_{\text{decay}}$ ) (**b**), and frequency (**c**) of mIPSCs recorded in WT and GAD65<sup>-/-</sup> interneurons in the presence of 1  $\mu$ M tetrodotoxin. No significant difference was observed between the sIPSCs of WT (n=18) and GAD65<sup>-/-</sup> (n=19). Error bars – SEM, N.S.  $P > 0.05$  unpaired *t*-test.
